# Supplementary material for: A self-healing flexible urea-g-MWCNTs/poly(urethane-sulfide) nanocomposite for sealing electronic devices
Source: Royal Society of Chemistry journal article supplement (doi:10.1039/c9tc05255k), 2019-11-22
Supplement: c9tc05255k1.pdf [file c9tc05255k1.pdf]

## Supporting Information

### Self-Healing Flexible Urea-g-MWCNTs/Poly(urethane-sulfide)

#### Nanocomposite for Sealing Electronic Devices

Qiming Yan    Qi Fu    Jianfeng Hu\*    Heqing Fu\*

School of Chemistry and Chemical Engineering, Guangdong Provincial Key Lab of Green Chemical Product Technology, South China University of Technology, Guangzhou 510640, P.R. China;

\*Corresponding author; E-mail address: cejfhu@scut.edu.cn; fuhq@scut.edu.cn

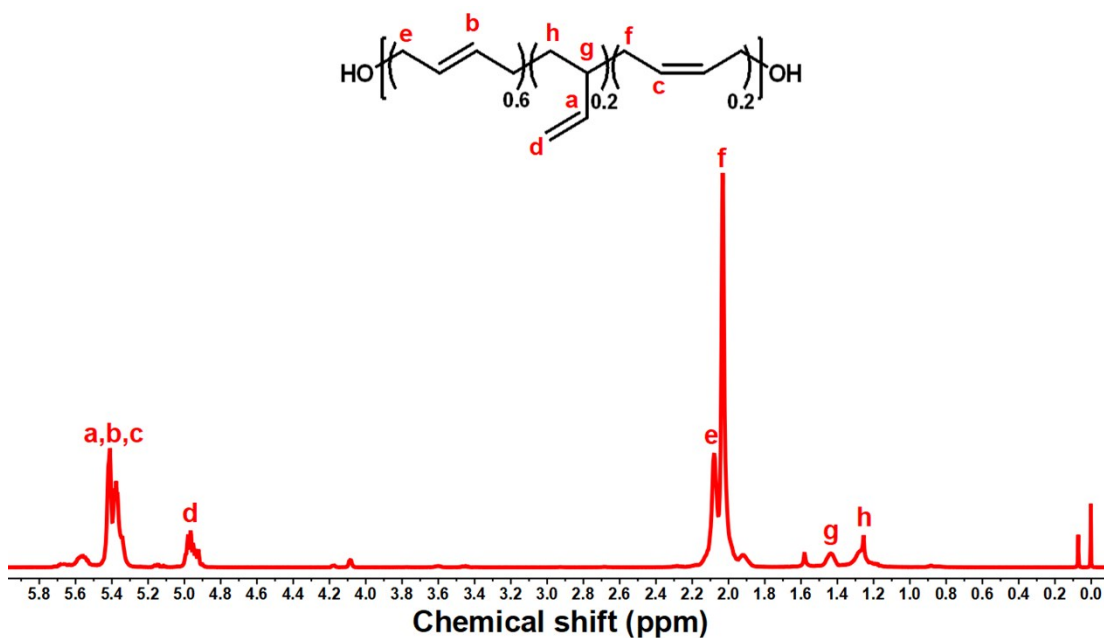

**Figure S1.** <sup>1</sup>H NMR spectrum of HTPB in CDCl<sub>3</sub> (400MHz).

In the <sup>1</sup>H NMR spectrum of HTPB, the peaks at 5.35-5.45 ppm correspond to the -CH= proton of the 1,2-vinyl units and 1,4-(cis and trans) units. The

peak at 4.97 ppm is attributed to the =CH<sub>2</sub> proton of the 1,2-vinyl units. The peaks at 1.97-2.25 ppm are assigned to the -CH<sub>2</sub>- protons of the 1,4-(cis and trans) units. The peaks at 1.45 ppm and 1.26 ppm belong to the CH and -CH<sub>2</sub>- protons of 1,2-vinyl units[1-3].

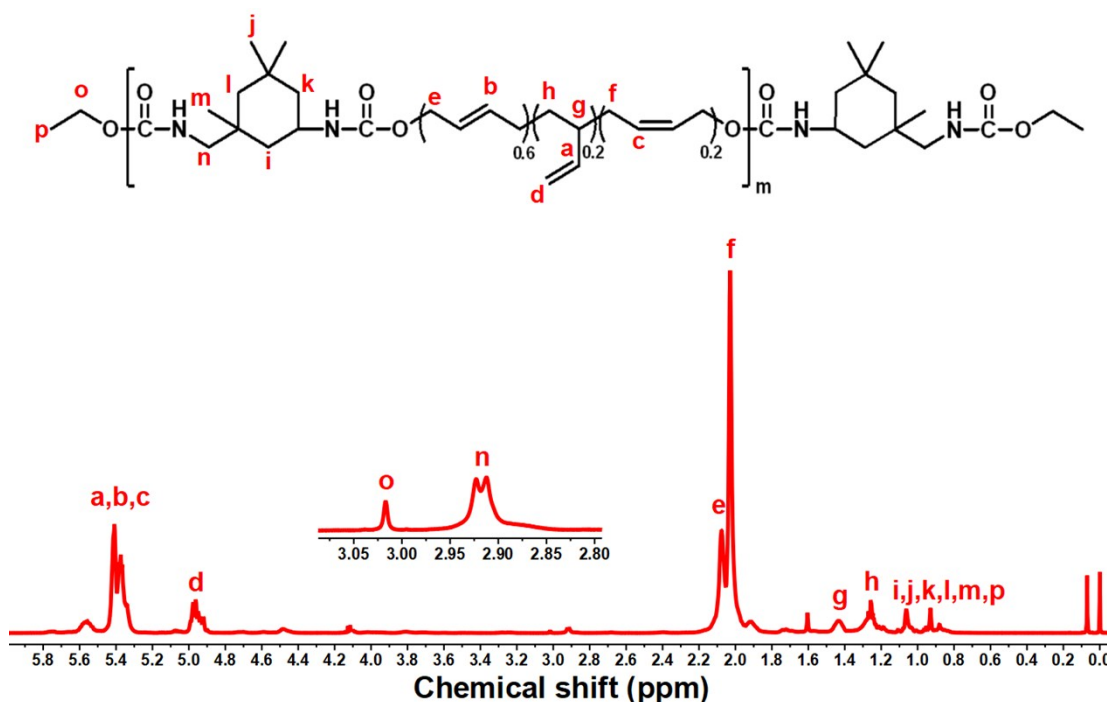

**Figure S2.** <sup>1</sup>H NMR spectrum of the ethanol-terminated polyurethane in CDCl<sub>3</sub> (400MHz).

Compared to the <sup>1</sup>H NMR spectrum of HTPB, the new peaks at 0.88-1.06 ppm for -CH<sub>3</sub> and -CH<sub>2</sub>- protons of IPDI were observed. The peaks at 2.90-2.94 ppm and 3.02 ppm are attributed to the methylene proton of -CH<sub>2</sub>-NH-COO- and methylene proton of ethanol, respectively[4-5].

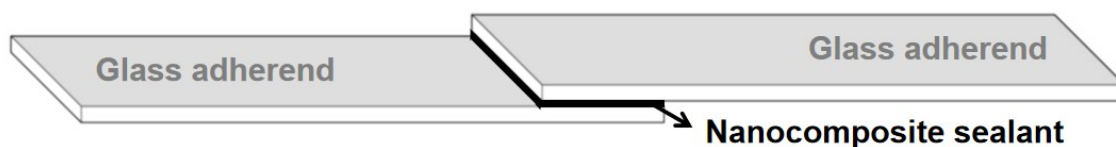

**Figure S3.** The model of lap-shear test for nanocomposite.

**Table S1. Compositions and mechanical properties of nanocomposite**

| Samples | Compositions         |                                        |                     | Mechanical properties     |                        |
|---------|----------------------|----------------------------------------|---------------------|---------------------------|------------------------|
|         | Urea-g-MWCNTs<br>(g) | Ethanol-terminated<br>polyurethane (g) | *Crosslinker<br>(g) | Tensile<br>strength (MPa) | Breaking strain<br>(%) |
| ETPU*   | 0                    | 50                                     | 0                   | 1.81±0.12                 | 521±15                 |
| PUS2*   | 0                    | 50                                     | 2                   | 2.30±0.09                 | 463±11                 |
| PUS4*   | 0                    | 50                                     | 4                   | 2.71±0.10                 | 351±14                 |
| PUS6*   | 0                    | 50                                     | 6                   | 3.15±0.05                 | 270±10                 |
| PUS8*   | 0                    | 50                                     | 8                   | 3.87±0.03                 | 242±8                  |
| PUS10*  | 0                    | 50                                     | 10                  | 4.03±0.10                 | 145±14                 |
| ETPU    | 0.15                 | 50                                     | 0                   | 2.12±0.09                 | 515±14                 |
| PUS2    | 0.15                 | 50                                     | 2                   | 2.62±0.08                 | 451±13                 |
| PUS4    | 0.15                 | 50                                     | 4                   | 3.01±0.13                 | 344±17                 |
| PUS6    | 0.15                 | 50                                     | 6                   | 3.58±0.06                 | 258±9                  |
| PUS8    | 0.15                 | 50                                     | 8                   | 4.03±0.10                 | 234±13                 |
| PUS10   | 0.15                 | 50                                     | 10                  | 4.22±0.11                 | 133±15                 |
| PUOD4   | 0.15                 | 50                                     | 4                   | 3.18±0.10                 | 331±4                  |
| PUOD6   | 0.15                 | 50                                     | 6                   | 3.65±0.08                 | 243±11                 |
| PUOD8   | 0.15                 | 50                                     | 8                   | 4.12±0.09                 | 222±13                 |

\* PUOD4, PUOD6 and PUOD6 use 3,6-dioxa-1,8-octanedithiol as crosslinker, the other samples use polysulfide oligomer as crosslinker.

**Table S2. TGA results of PUS $\chi$ \***

| Samples | T <sub>1.5%</sub> (°C) | T <sub>5%</sub> (°C) | T <sub>50%</sub> (°C) | T <sub>90%</sub> (°C) |
|---------|------------------------|----------------------|-----------------------|-----------------------|
| PUS2*   | 211.3                  | 229.2                | 401.8                 | 445.4                 |
| PUS4*   | 214.5                  | 237.9                | 404.5                 | 447.6                 |
| PUS6*   | 218.8                  | 250.3                | 409.1                 | 455.4                 |
| PUS8*   | 221.9                  | 259.0                | 413.3                 | 458.2                 |
| PUS10*  | 225.2                  | 267.7                | 415.4                 | 460.7                 |

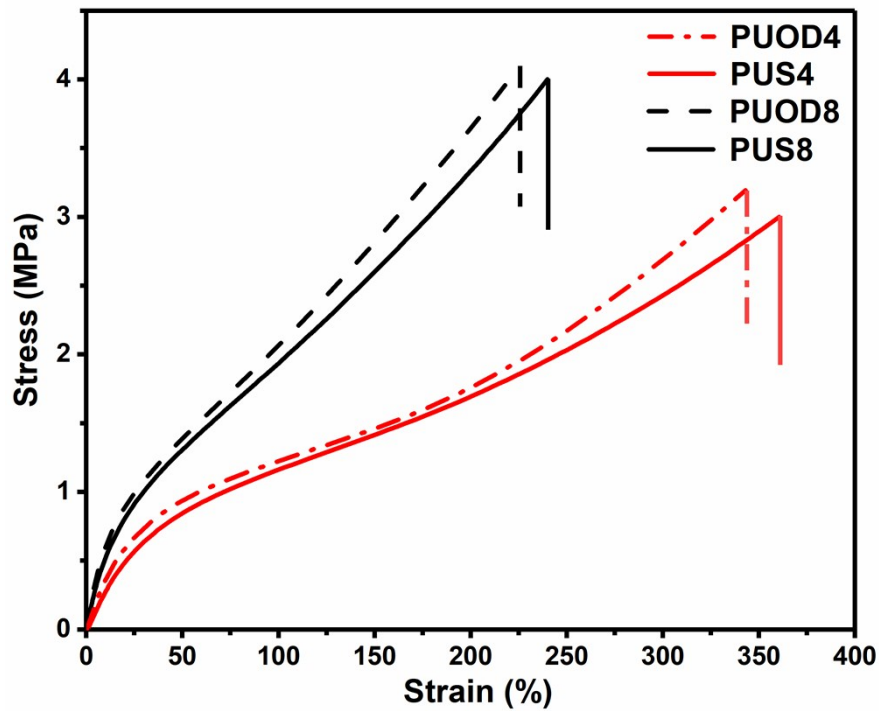

**Figure S4.** The stress-strain curves of the nanocomposite containing disulfide bonds and irreversible covalent bonds.

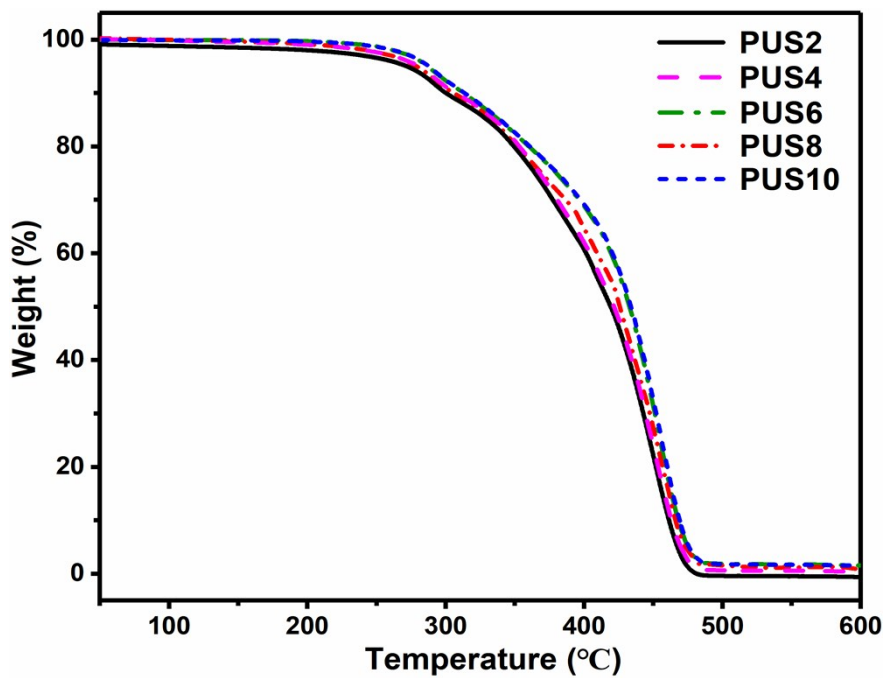

**Figure S5.** TGA curves of flexible U-MWC-PUS nanocomposite.

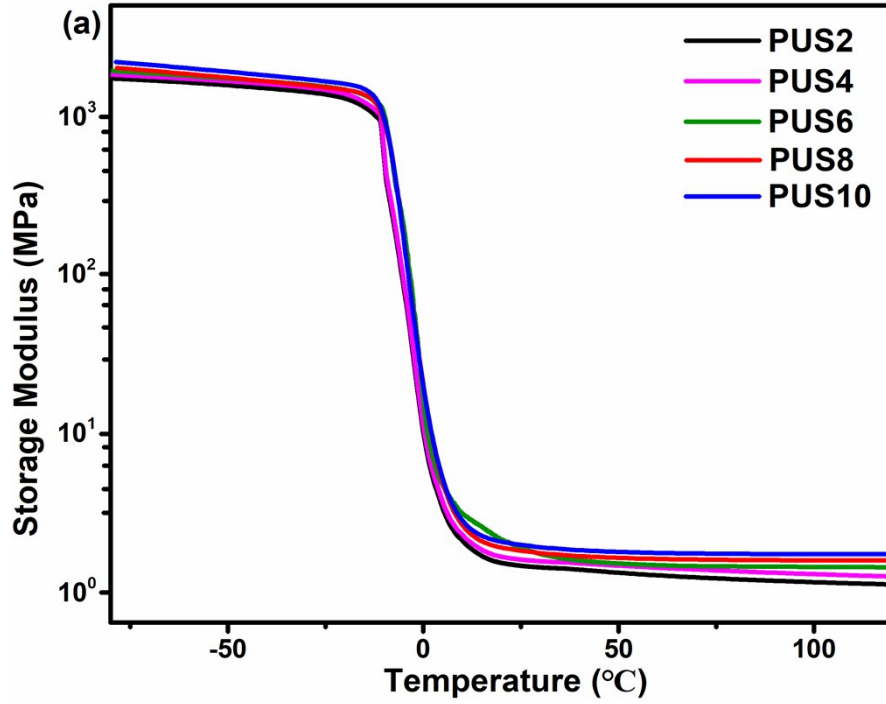

**Figure S6.** Storage modulus of flexible U-MWC-PUS nanocomposite.

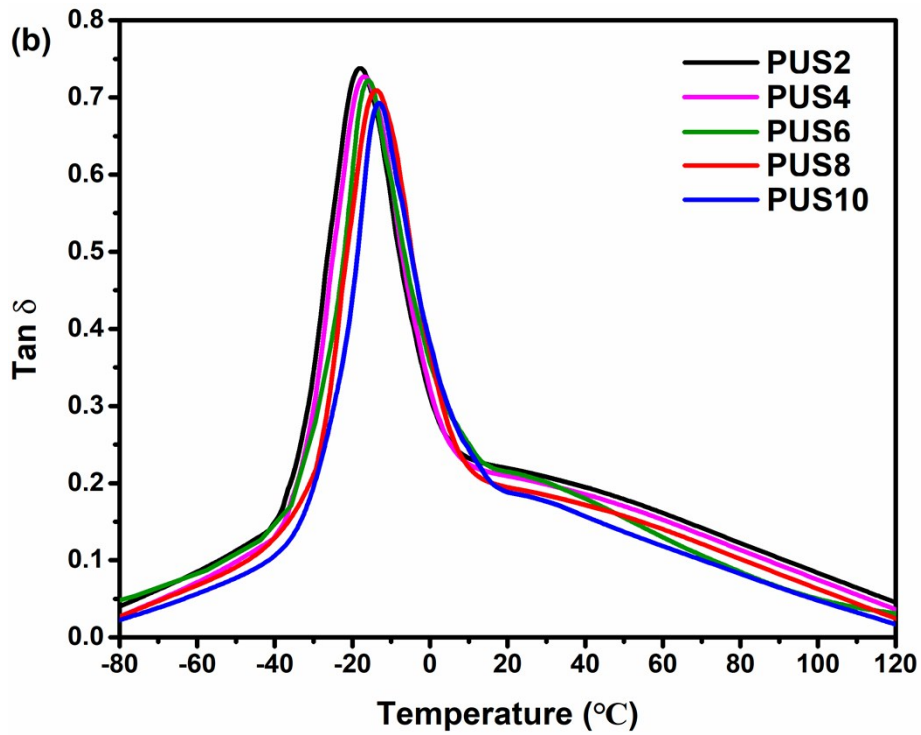

**Figure S7.**  $\text{Tan } \delta$  curves of flexible U-MWC-PUS nanocomposite.

**Table S3.** Mechanical properties of PUS6, PUS6\* and PUOD6

| Sample | Original               |                     | Self-healed            |                     | Self-healing efficiency (%) |
|--------|------------------------|---------------------|------------------------|---------------------|-----------------------------|
|        | Tensile strength (MPa) | Breaking strain (%) | Tensile strength (MPa) | Breaking strain (%) |                             |
| PUS6   | 3.58±0.06              | 258±9               | 3.29±0.12              | 234±15              | 92.0                        |
| PUS6*  | 3.15±0.05              | 270±10              | 2.67±0.08              | 221±11              | 84.7                        |
| PUOD6  | 3.65±0.08              | 243±11              | 0.34±0.05              | 15±4                | 9.2                         |

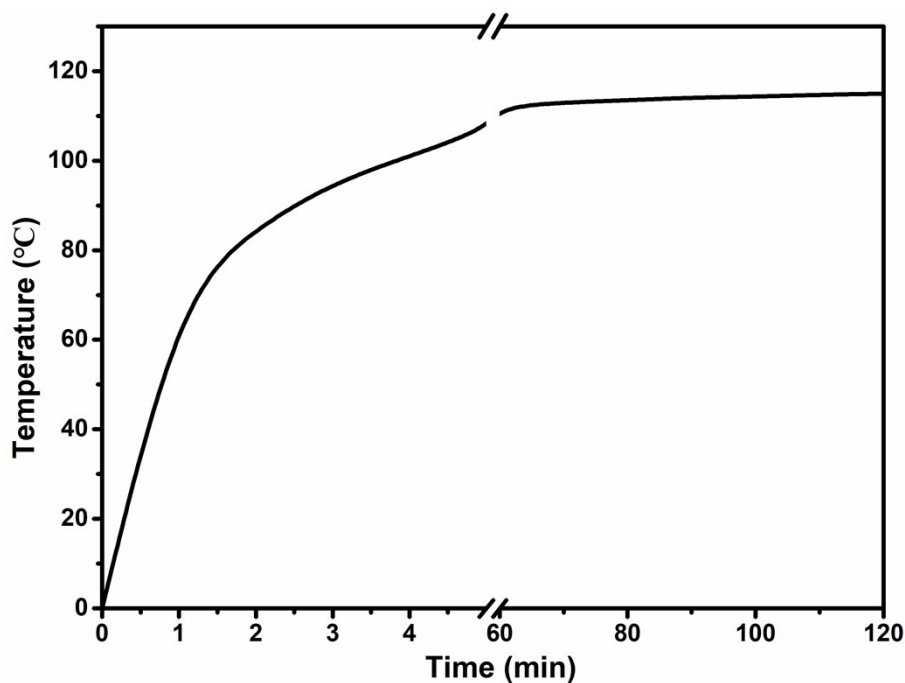

**Figure S8.** The temperature of the PUS6 crack surface varying with NIR irradiation time.

## REFERENCES

- [1] W. Wu, X. Zeng, H. Li, X. Lai, F. Li, J. Guo, Synthesis and characterization of a novel macromolecular hindered phenol antioxidant and its thermo-oxidative aging resistance for natural rubber, *J. Macromol. Sci. B* 2014, 53, 1244-1257.

- [2] Y. He, Q. Li, C. Zhu, H. Li, S. Zheng, Z. Xue, Y. Hu, Synthesis and properties of thermoplastic polyethylene based polyurethanes (PE-PU), *J. Polym. Res.* 2018, 25, 122.
- [3] B.S. Cho, S.T. Noh, Thermal properties of polyurethane binder with 2-(ferrocenylpropyl)dimethylsilane-grafted hydroxyl-terminated polybutadiene, *J. Appl. Polym. Sci.* 2011, 121, 3560-3568.
- [4] H. Daemi, M. Barikani, M. Barmar, Compatible compositions based on aqueous polyurethane dispersions and sodium alginate, *Carbohydr. Polym.* 2013, 92, 490-496.
- [5] C. Fang, X. Zhou, Q. Yu, S. Liu, D. Guo, R. Yu, J. Hu, Synthesis and characterization of low crystalline waterborne polyurethane for potential application in water-based ink binder, *Prog. Org. Coat.* 2014, 77, 61-71.
